# Supplementary material
Source: Royal Society of Chemistry journal article supplement (doi:10.1039/d6cc02500e)
Supplement: d6cc02500e1.pdf [file d6cc02500e1.pdf]

## Supplementary Information

### Bright and Stable CsPbBr<sub>3</sub> Nanoplatelets via Dual-functional Short-Chain Ligand Passivation for Deep-Blue Light-Emitting Diodes

Zhirui Liu,<sup>a</sup> Zhijun Liu,<sup>a</sup> Dian Jin,<sup>a</sup> Tongge Li,<sup>a</sup> Qian Miao,<sup>\*a</sup> Lanlan Zhai,<sup>a</sup> He Huang,<sup>a</sup> Yun Yang,<sup>a</sup> Lijie Zhang,<sup>a</sup> Jun Zou<sup>\*b,c</sup> and Chao Zou<sup>\*a</sup>

<sup>a</sup>College of Chemistry and Materials Engineering, Wenzhou University, Wenzhou 325035, China

<sup>b</sup>Institute of New Materials & Industrial Technology, Wenzhou University, Wenzhou 325024, China

<sup>c</sup>School of Science, Shanghai Institute of Technology, Shanghai 201418, China

Corresponding Author\*

Correspondence and phone calls about the manuscript should be directed to Qian Miao, Jun Zou, Chao Zou at the following address, phone and fax number, and e-mail address:

Prof. Qian Miao, E-mail: [miaoqian@wzu.edu.cn](mailto:miaoqian@wzu.edu.cn)

College of Chemistry and Materials Engineering, Wenzhou University, Wenzhou, 325035, China

Prof. Jun Zou, E-mail: [zoujun@sit.edu.cn](mailto:zoujun@sit.edu.cn)

Institute of New Materials & Industrial Technology, Wenzhou University, Wenzhou, 325024, China

School of Science, Shanghai Institute of Technology, Shanghai, 201418, China

Prof. Chao Zou, E-mail: [zouchao@wzu.edu.cn](mailto:zouchao@wzu.edu.cn)

College of Chemistry and Materials Engineering, Wenzhou University, Wenzhou, 325035, China

## Experimental Section

### Materials:

Lead bromide ( $\text{PbBr}_2$ , 99.9%), Cesium carbonate ( $\text{Cs}_2\text{CO}_3$ , 99.9%), 1-Octadecene (ODE, 90%), Toluene (AR), Oleylamine (OAm, 80%), Oleic acid (OA, 90%), Methyl acetate (98%), 2-Propanol (IPA, anhydrous, 99.5%) were purchased from Meryer. Ethanesulfonic acid (EtSA, 99%), 2-Bromoethanesulfonic acid (BrEtSA, 99%), and 1,2-Dibromoethane (EDB, 99%) were purchased from Adamas. Octane (anhydrous, 99%) were purchased from Aladdin. Lithium fluoride (LiF, 99%) were purchased from Alfa Aesar. Poly(3,4-ethylenedioxythiophene): polystyrene sulfonate (PEDOT: PSS, 4083), poly[bis(4-phenyl) (4-butyl-phnyl)amine] (poly-TPD,  $M_w \geq 20000$ ), poly(N-vinylcarbazole) (PVK,  $M_n < 50000$ ), and 1,3,5-Tris(1-phenyl-benzimidazol-2-yl) benzene (TPBi, 99.9%) were purchased from Xi'an Polymer Light Technology Co. Ltd.

### Preparation of $\text{CsPbBr}_3$ NPL:

First, a cesium oleate (Cs-OA) solution was obtained by dissolving 0.162 g of  $\text{Cs}_2\text{CO}_3$  in 5 mL OA at 120 °C with continuous stirring. For preparing BrEtSA-NPL, 0.072 g of  $\text{PbBr}_2$ , and 0.02 g BrEtSA were dissolved in 4 mL of ODE in a vial together with 0.5 mL of OAm and 0.5 mL of OA and heated to 120 °C. Subsequently, 0.5 mL of Cs-OA was blended with  $\text{PbBr}_2$  solution in ambient conditions, followed by the addition of 0.5 mL of IPA while stirring for 60 s. After 10 min of stirring and heating at 70 °C, the solution was cooled in a cold-water bath. Then the precipitate was obtained with the centrifugation of the solution at 8000 rpm for 3 min. The precipitate was redispersed in the solution (1 mL of toluene and 1 mL of methyl acetate) for further purification. The precipitates were collected and redispersed in 1 mL of octane. For Control-NPL, all the other procedures were identical except for without the presence of BrEtSA in the reaction solution. The fabrication was carried out in ambient air.

### Device fabrication:

Patterned ITO-coated glass substrates were washed with deionized water, ethanol, acetone, isopropanol and ethanol for 20 min, and dried with a nitrogen blow gun. Then the ITO was cleaned with ultraviolet ozone for 15 min. PEDOT: PSS was spin-coated onto the substrates at 5000 rpm for 40 s followed by annealing at 120 °C for 20 min in ambient air. After cooling, the substrates were then transferred into a  $\text{N}_2$  filled glovebox ( $\text{O}_2 < 0.1$  ppm,  $\text{H}_2\text{O} < 0.1$  ppm). Next, poly-TPD (5 mg  $\text{mL}^{-1}$ ) and PVK (5 mg  $\text{mL}^{-1}$ ) 1:1 mixed solution was spin-coated at 2500 rpm for 30 s and followed by baking at 150 °C for 20 min. The perovskite films were obtained by spin-coating the precursor solution in glove box at 2500 rpm for 40s. Finally, TPBi (35 nm), LiF (1 nm), and Al (100 nm) were deposited under a pressure of  $\sim 5 \times 10^{-4}$  Pa. The active area of the devices was 8  $\text{mm}^2$  as defined by the overlapping area of the ITO and Al electrode. All devices were tested in atmospheric environments.

### Characterization:

UV-vis absorption spectra were obtained through the Shimadzu UV-1800 spectrophotometer. The steady-state photo-luminescence (PL), PL quantum yield (PLQY), and time-resolved PL (TRPL) were measured employing an FLS980 spectrofluorometer (Edinburgh Instruments Ltd). The excitation source is 365 nm from a Xe lamp for PL and the time-resolved luminescence decay was analyzed through time-correlated single-photon counting with a 375 nm laser. X-ray diffraction (XRD) analysis was performed utilizing a Bruker D8 advance X-ray diffractometer with graphite monochromatized  $\text{Cu K}\alpha$  ( $\lambda = 1.5405$  Å) radiation, operating with a step of 0.02° and a scan speed of 4°  $\text{min}^{-1}$  in a 2 $\theta$  scale from 3° to 40°. X-ray photoelectron spectroscopy (XPS) was executed

using a Bruker instrument. Additionally, Transmission electron microscopy (TEM) was carried out using a JEM-2010F.  $^1\text{H}$  nuclear magnetic resonance (NMR) measurements were performed with a Quantum-I Plus-400 NMR spectrometer (FT, 400 MHz for  $^1\text{H}$ ) by using deuterated DMSO- $d_6$  as the solvent. The Fourier Transform Infrared (FTIR) spectra were recorded with a Thermo Fisher iS50 FTIR. The characterization of current density-luminance-voltage, electroluminescence (EL), external quantum efficiency (EQE) and operating lifetime of the PeLED were conducted simultaneously by using a commercialized system (Shenzhen Spectrum Research Connected Technology Co., Ltd) equipped with Keithley 2400, a fiber integrating sphere and Ocean Optics QE65 Pro spectrometer.

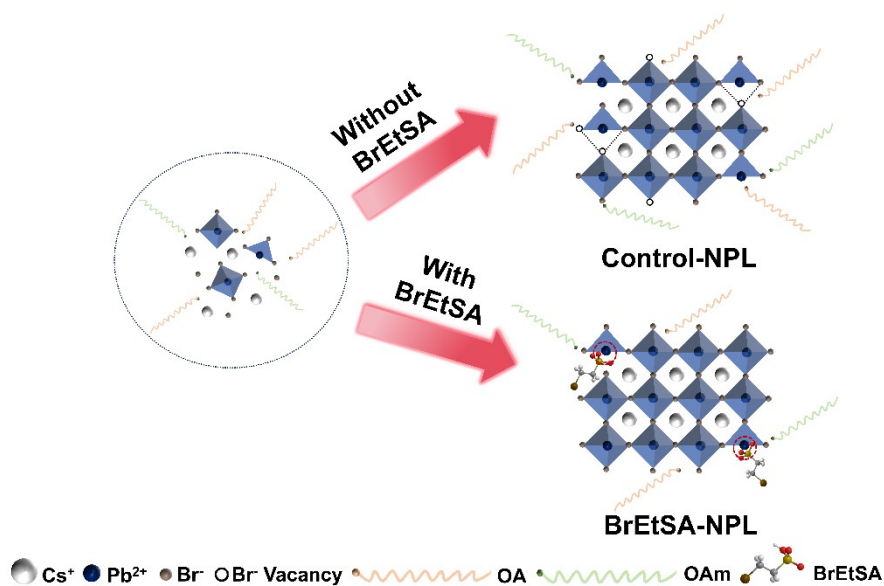

Figure S1. Schematic illustration of surface passivation of CsPbBr<sub>3</sub> NPL.

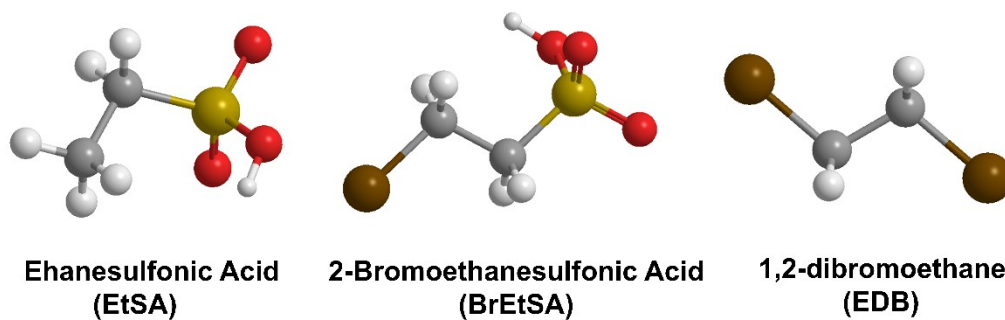

Figure S2. The molecular structures of ethanesulfonic acid, 2-bromoethanesulfonic acid, and 1,2-dibromoethane.

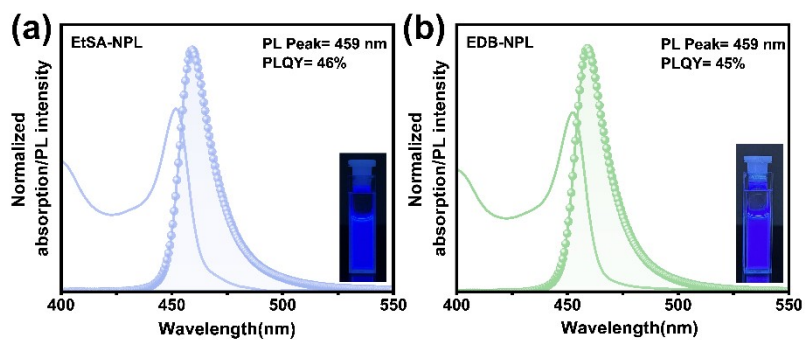

Figure S3. UV-vis absorption and PL spectra of CsPbBr<sub>3</sub>. (a) EtSA-NPL, (b) EDB-NPL. The insets show photos of NPL solutions under 365 nm UV light irradiation.

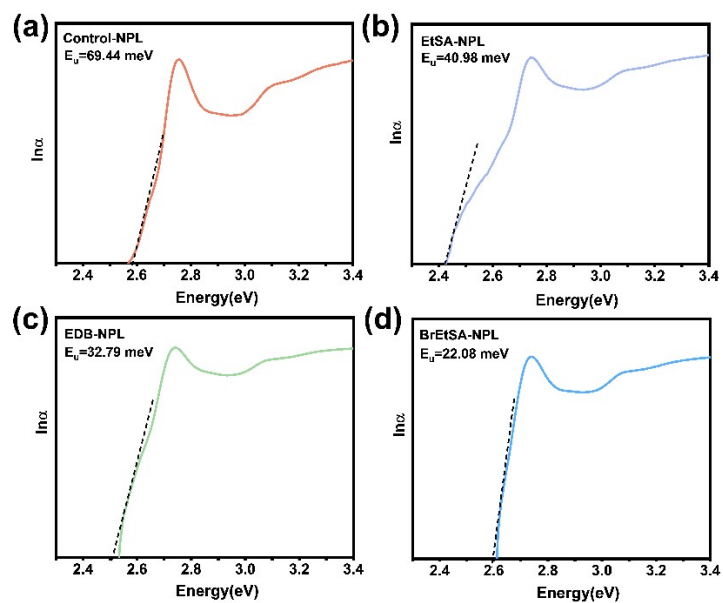

Figure S4. Ulbach energy spectra for (a) Control-NPL, (b) EtSA-NPL, (c) EDB-NPL, and (d) BrEtSA-NPL.

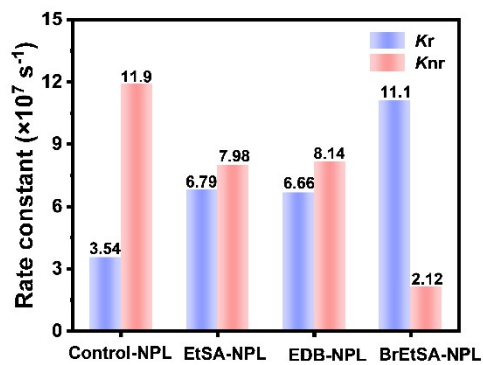

Figure S5. Calculated recombination rate constants of Control-NPL, EtSA-NPL, EDB-NPL, and BrEtSA-NPL.

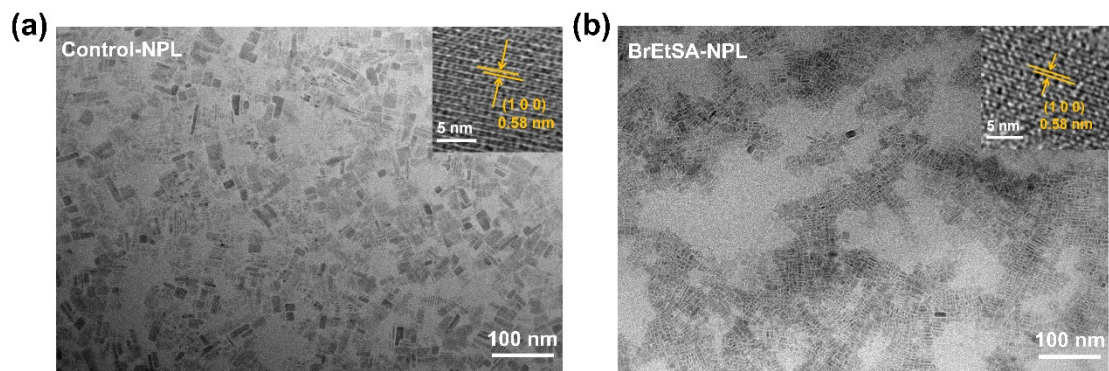

Figure S6. TEM images of (a) Control-NPL, (b) BrEtSA-NPL. The insets are HRTEM images.

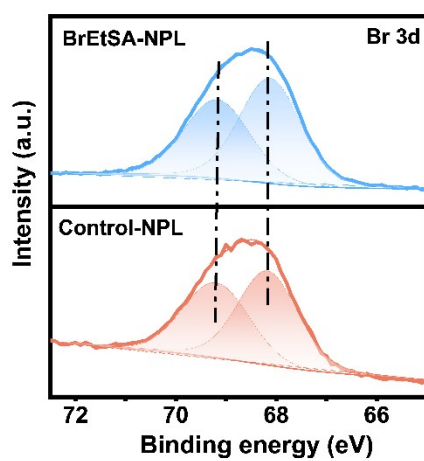

Figure S7. XPS spectra of Br 3d of Control-NPL, and BrEtSA-NPL.

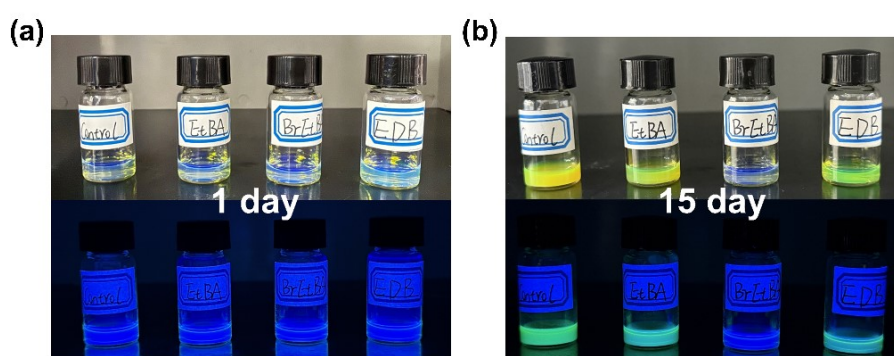

Figure S8. Photographs of sample solutions after the same storage period under daylight (top) and 365 nm UV light (bottom): (a) 1 day, (b) 15 days.

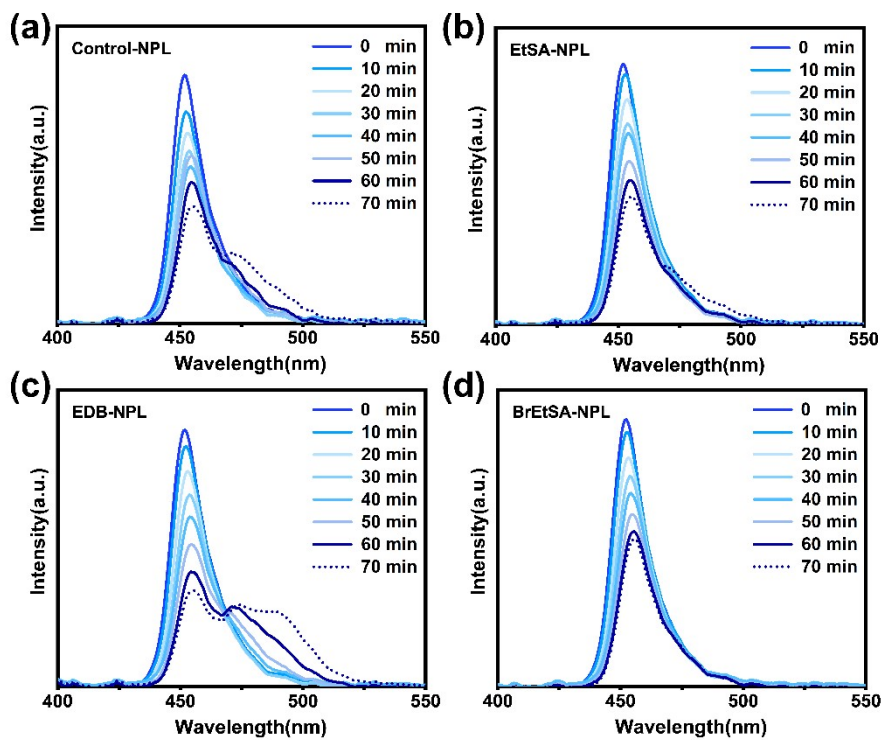

Figure S9. (a) Control-NPL, (b) EtSA-NPL, (c) EDB-NPL, and (d) BrEtSA-NPL films PL spectra under ambient conditions (room temperature,  $25 \pm 2$  °C) with continuous UV light irradiation (365 nm, 6 mW/cm<sup>2</sup>).

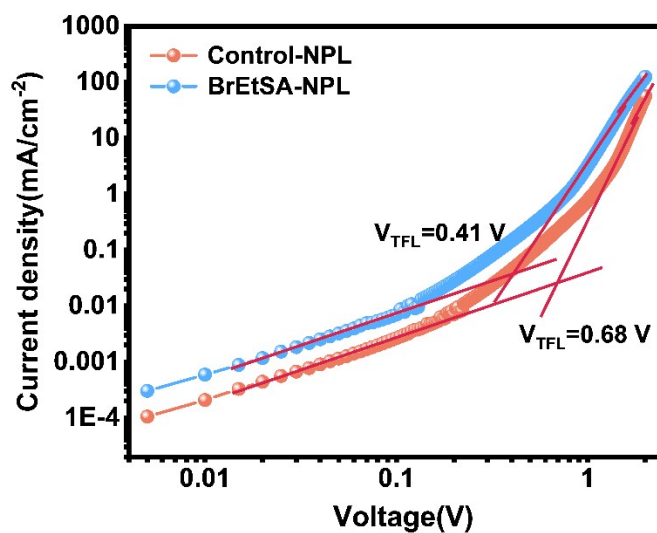

Figure S10. J-V curves of the hole-only devices.

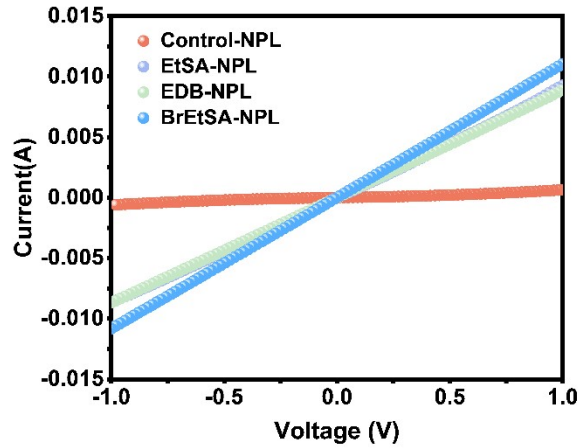

Figure S11. I-V curves of NPL film.

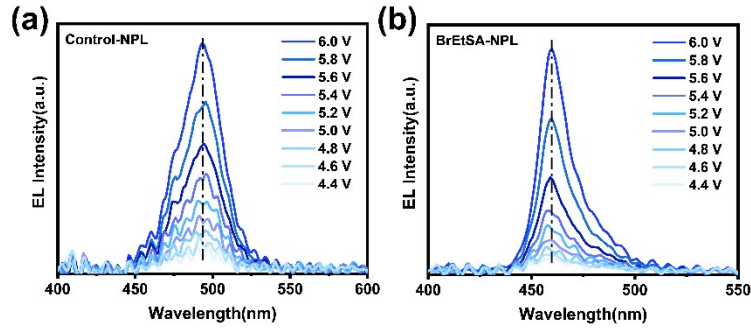

Figure S12. EL spectra of the device at different operating voltages.

Table S1. PL lifetime characteristics of Control-NPL, EtSA-NPL, EDB-NPL, and BrEtSA-NPL.

| Sample      | $\tau_1$ (ns) | $A_1$ (%) | $\tau_2$ (ns) | $A_2$ (%) | $\tau_3$ (ns) | $A_3$ (%) | $\tau_{ave}$ (ns) |
|-------------|---------------|-----------|---------------|-----------|---------------|-----------|-------------------|
| Control-NPL | 1.09          | 18.16     | 2.86          | 63.17     | 10.41         | 18.67     | 6.49              |
| EtSA-NPL    | 0.88          | 30.29     | 2.92          | 56.90     | 11.96         | 12.81     | 6.77              |
| EDB-NPL     | 1.03          | 31.05     | 3.01          | 54.05     | 11.41         | 17.97     | 6.76              |
| BrEtSA-NPL  | 1.18          | 25.78     | 3.22          | 58.12     | 12.55         | 16.10     | 7.56              |

$\tau_1$  (fast lifetime component): Attributed to defect-assisted non-radiative recombination, primarily reflecting the rapid capture and annihilation of charge carriers by deep-level defects at the surface or grain boundaries.

$\tau_2$  (medium lifetime component): Attributed to shallow defect-induced recombination or interface-assisted recombination processes. This component may involve exciton dissociation, diffusion of carriers to non-radiative centers, or surface-state-modulated recombination.

$\tau_3$  (slow lifetime component): Attributed to band-edge radiative recombination, representing the radiative recombination of free excitons, which serves as the main channel for efficient light emission.

All  $K_r$  and  $K_{nr}$  of the sample were calculated according to the following formula:

$$\tau_{\text{ave}} = 1/(K_r+K_{\text{nr}}) \text{ and PLQY} = K_r / (K_r+K_{\text{nr}})$$

where  $k_r$  and  $k_{\text{nr}}$  represent the radiative and nonradiative recombination rate constants, respectively.

Table S2. Performance parameters of blue PeLEDs.

| <b>Devices</b> | <b>V<sub>on</sub> (V)</b> | <b>L (cd m<sup>-2</sup>)</b> | <b>EQE (%)</b> | <b>EL (nm)</b> |
|----------------|---------------------------|------------------------------|----------------|----------------|
| Control-NPL    | 4.4                       | 291                          | 0.25           | 493            |
| BrEtSA-NPL     | 4.4                       | 50                           | 0.80           | 460            |
